# Supplementary material
Source: PubMed Central journal article supplement (PMC10282703)
Supplement: media-1.pdf [file media-1.pdf]

**SUPPLEMENTARY FIGURES, Fettsweis et al.**

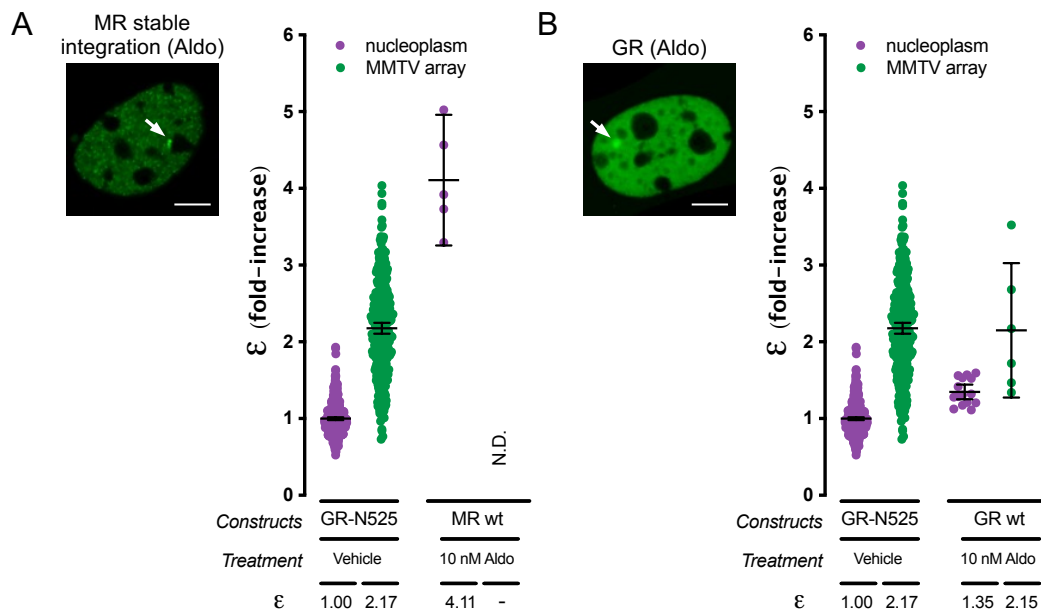

**Supplementary Figure S1.** (A) Representative image and molecular brightness ( $\epsilon$ ) in the nucleoplasm of cells stably expressing eGFP-tagged mouse MR (MR). We were unable to record from the MMTV array due to low levels of receptor expression. Individual dots represent values from one cell ( $n = 490, 307, 5$ ; N.D., not determined). (B) Representative image and molecular brightness ( $\epsilon$ ) obtained from cells expressing eGFP-tagged wild type mouse GR (GR) and treated with 10 nM aldosterone for 1h ( $n = 490, 307, 15, 6$ ). White arrows point to the MMTV array. Scale bars: 5  $\mu\text{m}$ . To facilitate comparison, data from Fig.1 showing  $\epsilon$  for GR-N525 in the nucleoplasm and MMTV array are shown.



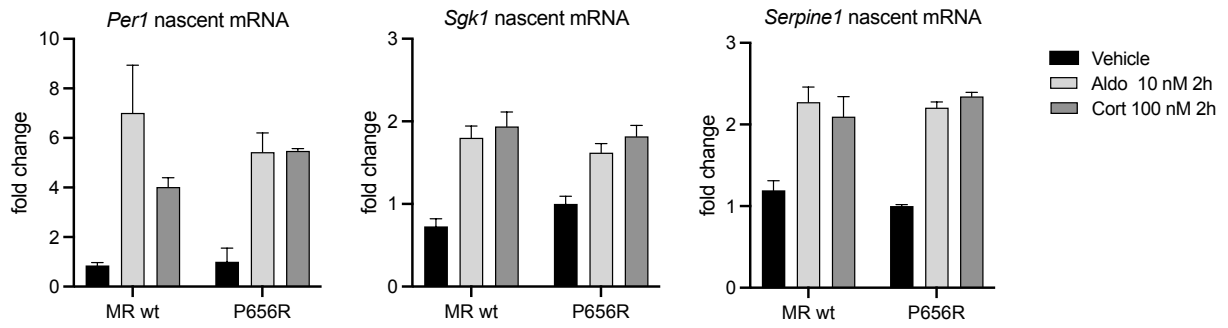

**Supplementary Figure S3.** RT-qPCR performed on three MR up-regulated genes in cells expressing wild type MR or MR mutant P656R. Cells were treated with vehicle, with 10 nM aldosterone or 100 nM corticosterone for 2h. Plots show fold changes in the indicated nascent mRNA abundance compared to MR-P656R treated with vehicle (n = 2).
